# Supplementary material for: A practical iodine-catalyzed oxidative conversion of aldehydes to nitriles
Source: Royal Society of Chemistry journal article supplement (doi:10.1039/c6ra26435b), 2017-01-01

## **A practical iodine-catalyzed oxidative conversion of aldehydes to nitriles**

Chaojie Fang, Meichao Li,\* Xinquan Hu, Weimin Mo, Baoxiang Hu, Nan Sun,  
Liqun Jin, and Zhenlu Shen\*

College of Chemical Engineering, Zhejiang University of Technology, Hangzhou 310014, PR  
China

## General Remarks

GC analyses were conducted on an Agilent GC 7890A system with a flame ionization detector (FID) and a PEG-20 capillary column. Phenylacetonitrile was selected as the internal standard for GC internal standard method in the optimization experiment. <sup>1</sup>H NMR spectra were carried out on a Bruker Avance III (500M Hz) spectrometer. CDCl<sub>3</sub> was used as the solvent with tetramethylsilane (TMS) as the internal standard. GC-MS was performed on a Finnigan Trace GC Ultra-Finnigan Trace DSQ instrument. ESI-MS was performed on an Agilent 6210 LC/TOF mass spectrometer. Melting points were measured using BUCHI M-565 melting point instrument.

Aldehydes **1a-20a**, **24a-26a**, **28a** were purchased from commercial suppliers. Substrates **21a-23a**, **29a** and **30a** were prepared in-house according to the previous work of us.<sup>1</sup> All the products were isolated from the reaction mixtures, and characterized by <sup>1</sup>H NMR

1. C. Fang, M. Li, X. Hu, W. Mo, B. Hu, N. Sun, L. Jin and Z. Shen, *Adv. Synth. Catal.*, 2016, **358**, 1157-1163.

# Copies of $^1\text{H}$ NMR spectrum for products 1b-30b

1b CDCl<sub>3</sub>

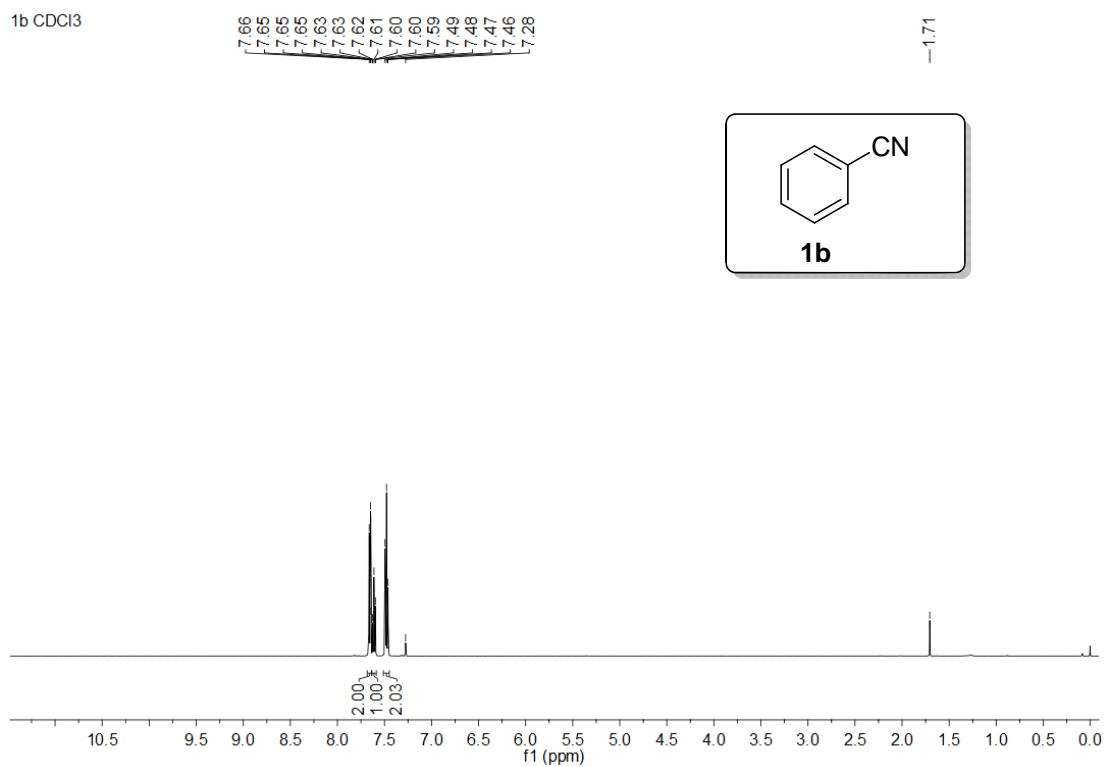

2b CDCl<sub>3</sub>

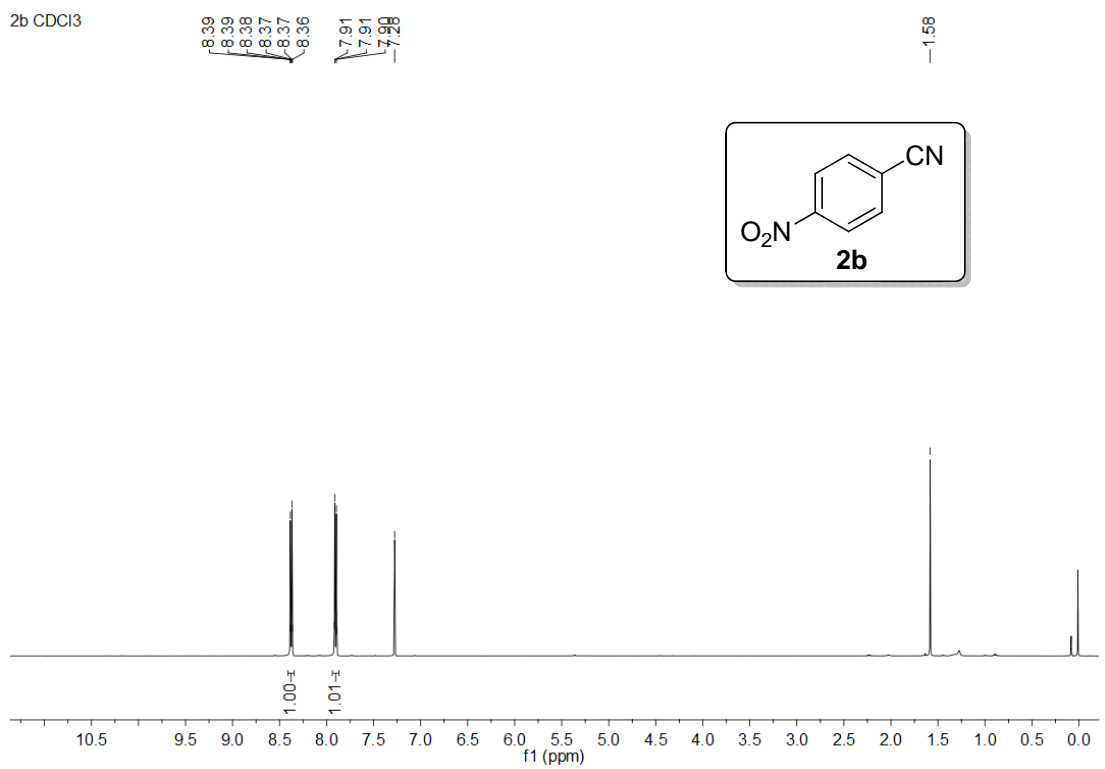

3b CDCl<sub>3</sub>

7.71  
7.70  
7.70  
7.69  
7.69  
7.68  
7.68  
7.67  
7.21  
7.20  
7.20  
7.19  
7.17  
7.17  
7.16

-1.65

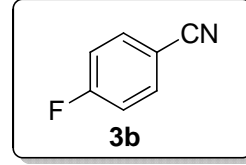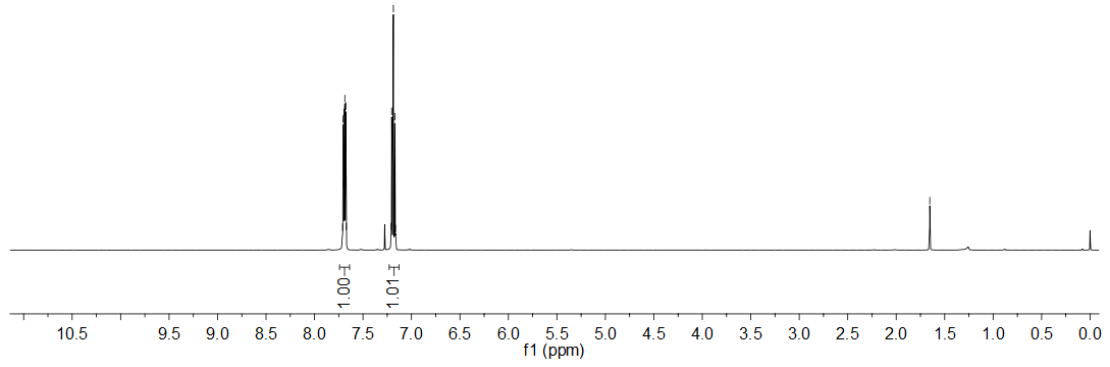

4b CDCl<sub>3</sub>

7.63  
7.63  
7.62  
7.61  
7.61  
7.61  
7.50  
7.49  
7.49  
7.48  
7.48  
7.47  
7.28

-1.62

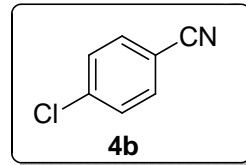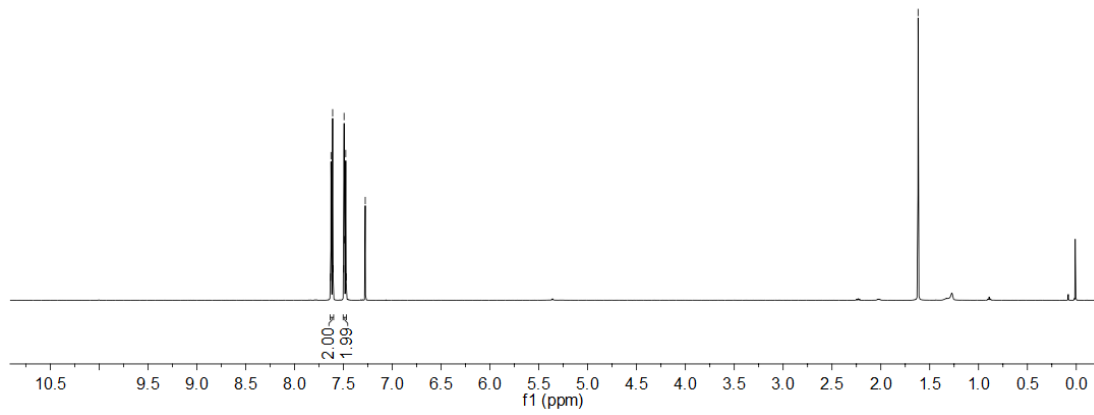

5b-CDCl<sub>3</sub>

7.65  
7.65  
7.61  
7.61  
7.60  
7.59  
7.59  
7.58  
7.58  
7.56  
7.56  
7.46  
7.44  
7.43  
7.28

-1.60

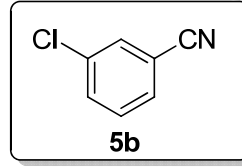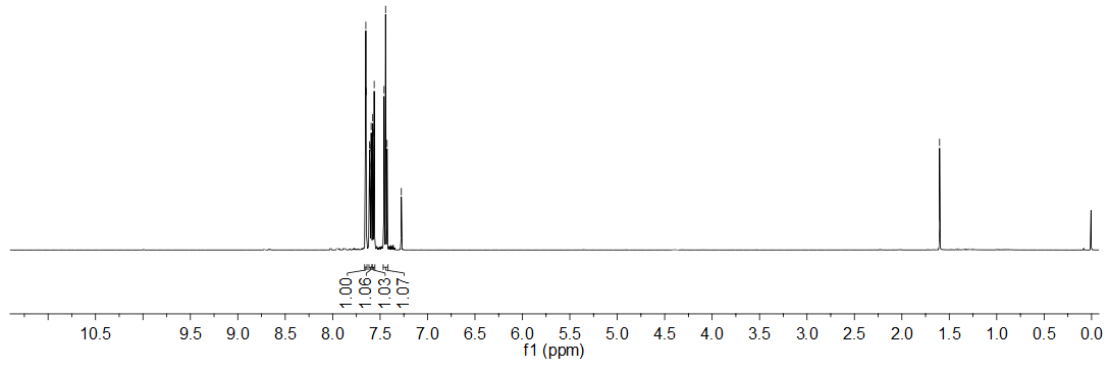

6b-CDCl<sub>3</sub>

7.70  
7.70  
7.68  
7.68  
7.58  
7.58  
7.57  
7.56  
7.55  
7.55  
7.54  
7.54  
7.52  
7.52  
7.41  
7.41  
7.40  
7.39  
7.38  
7.38  
7.28

-1.61

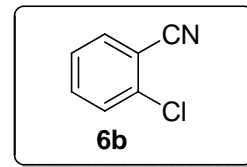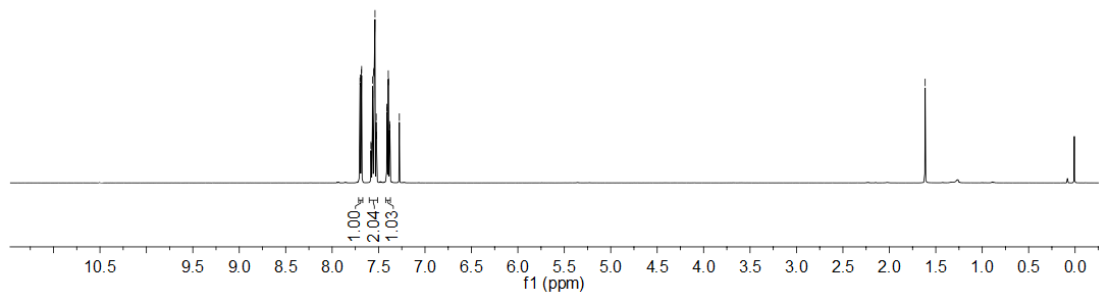

7b CDCl<sub>3</sub>

7.66  
7.66  
7.66  
7.64  
7.55  
7.55  
7.54  
7.53  
7.53  
7.28

-1.60

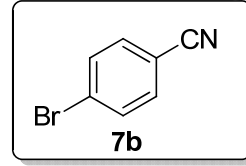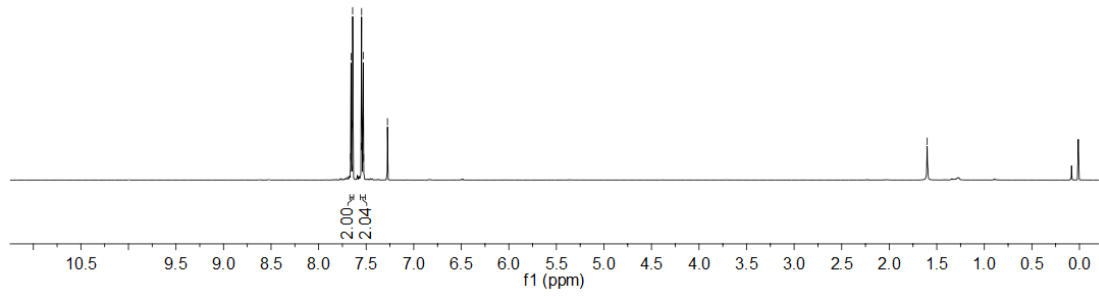

8b CDCl<sub>3</sub>

7.82  
7.81  
7.77  
7.75  
-7.28

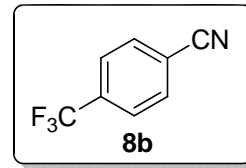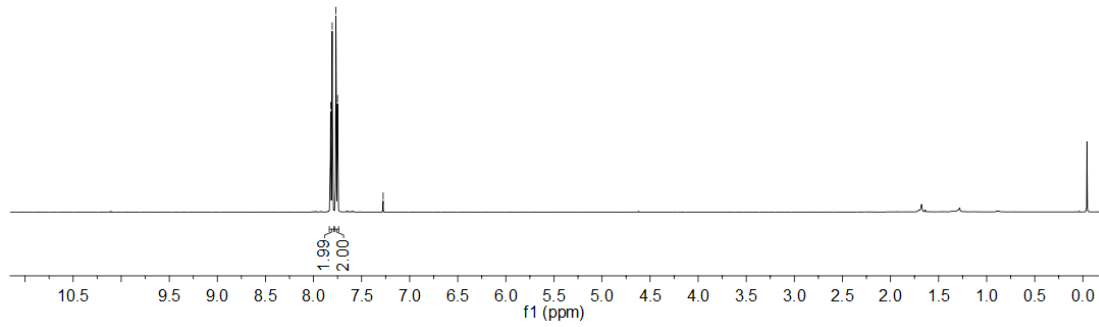

9b CDCl<sub>3</sub>

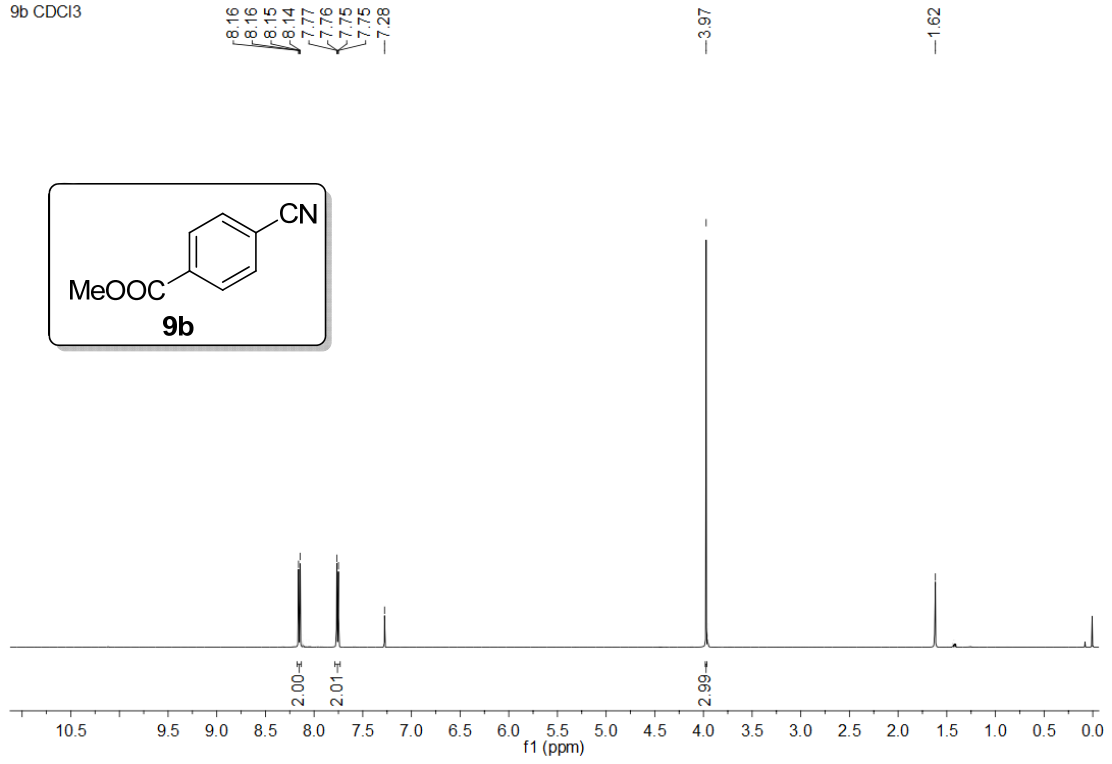

10b CDCl<sub>3</sub>

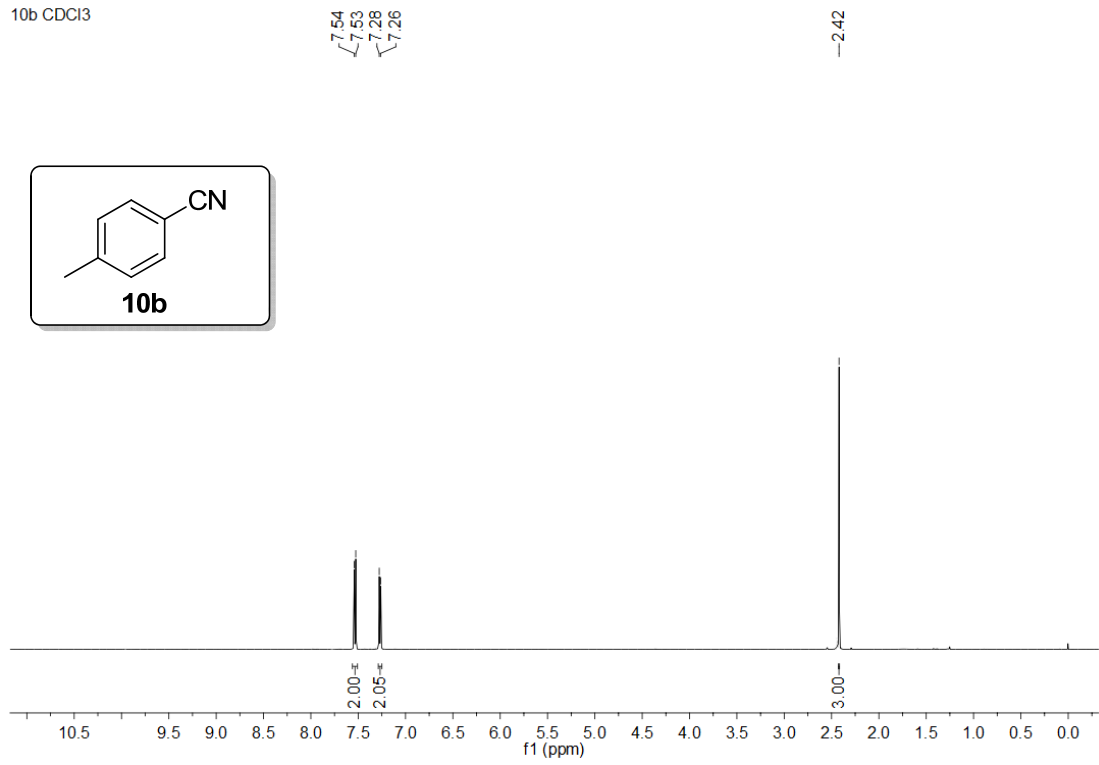

11b CDCl<sub>3</sub>

7.44  
7.43  
7.41  
7.39  
7.36  
7.35  
7.35  
7.34  
7.33  
7.32  
7.28

-2.38

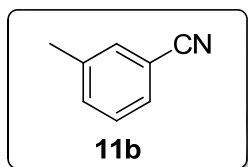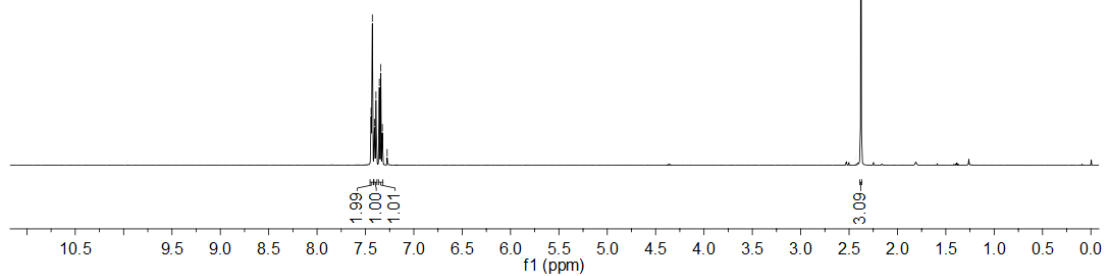

12b CDCl<sub>3</sub>

7.57  
7.56  
7.48  
7.47  
7.45  
7.45  
7.31  
7.30  
7.27  
7.25  
7.24

-2.52

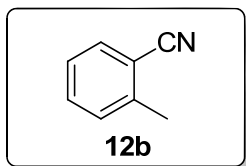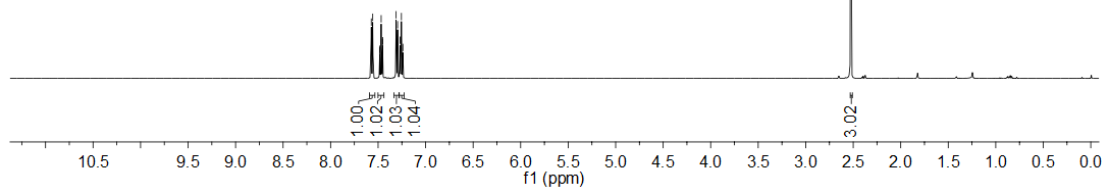



13b CDCl<sub>3</sub>

7.60  
7.60  
7.59  
7.58  
7.27  
7.27  
6.97  
6.96  
6.95  
6.94  
6.94

-3.86

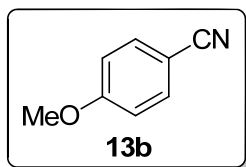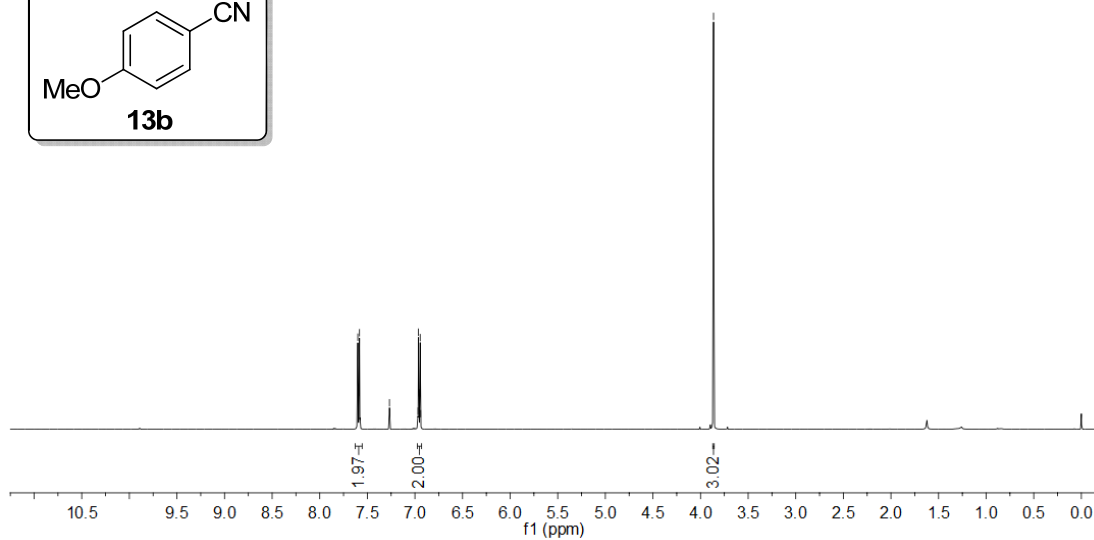

14b CDCl<sub>3</sub>

7.30  
7.30  
7.29  
7.28  
7.27  
7.09  
7.08  
6.91  
6.90

3.94  
3.91

-1.59

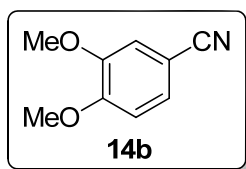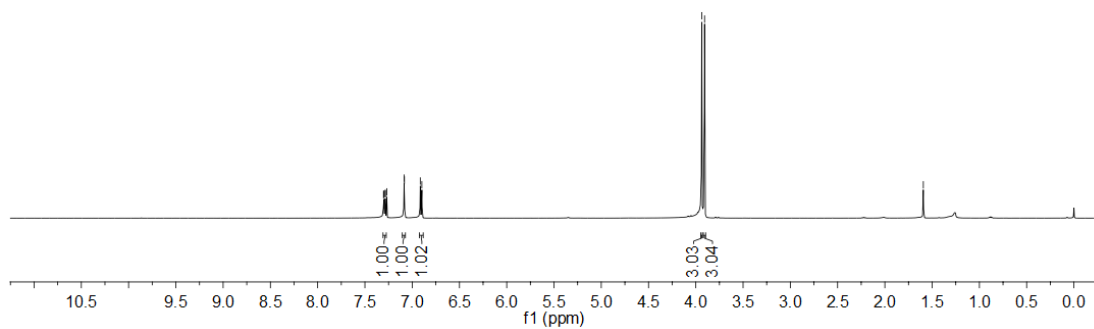

15b CDCl<sub>3</sub>

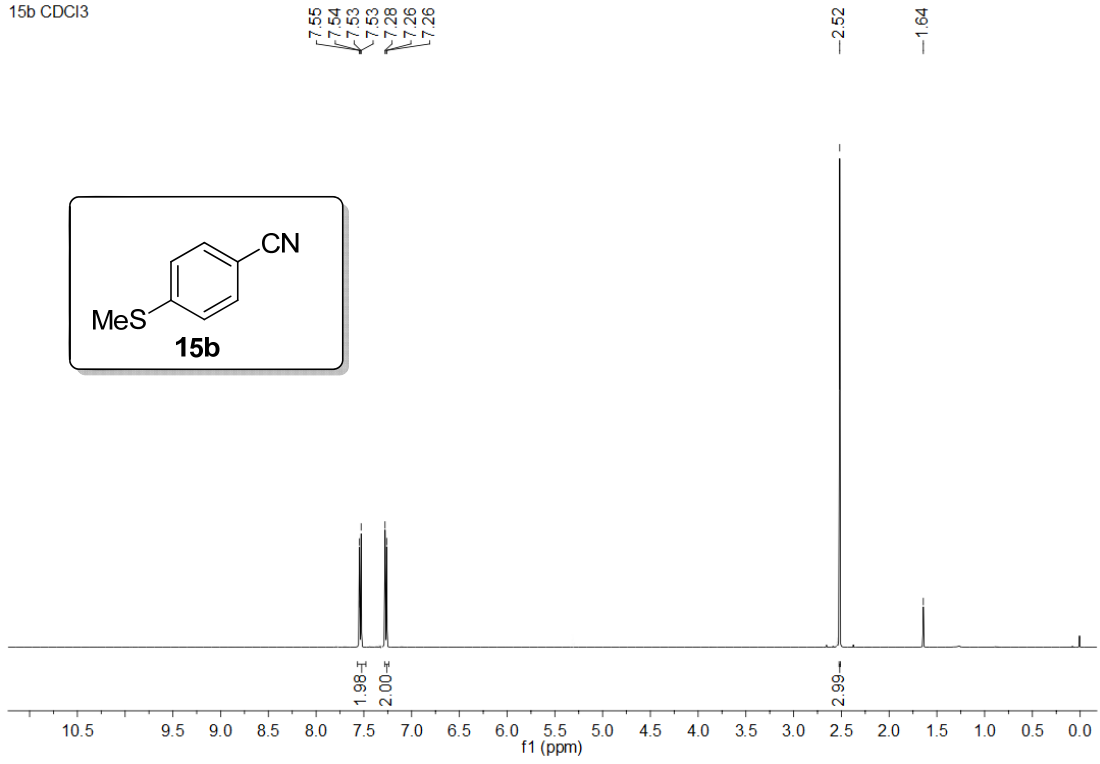

16b CDCl<sub>3</sub>

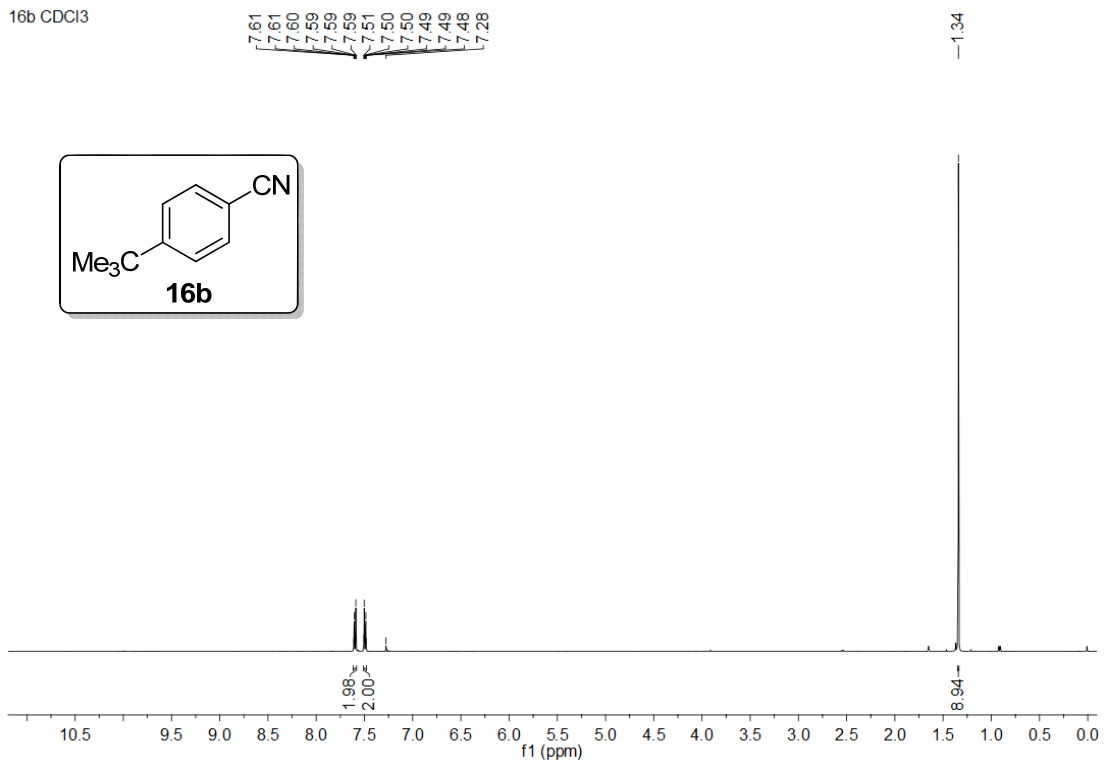

17b CDCl3

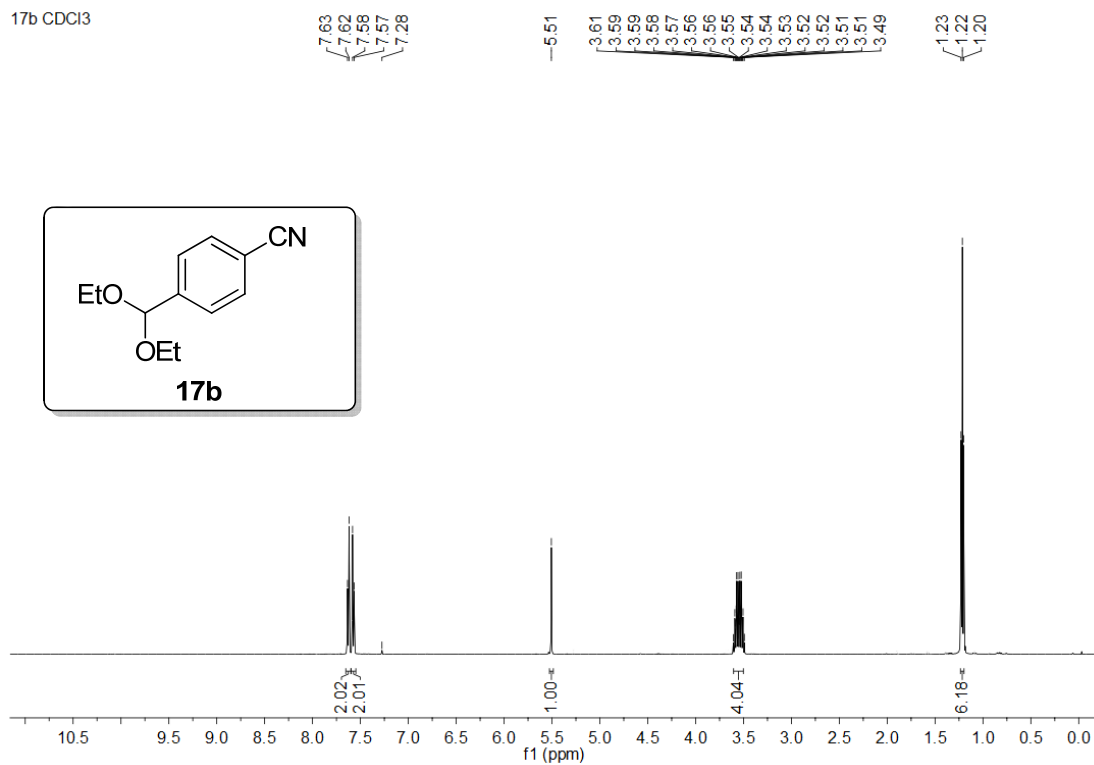

18b CDCl3

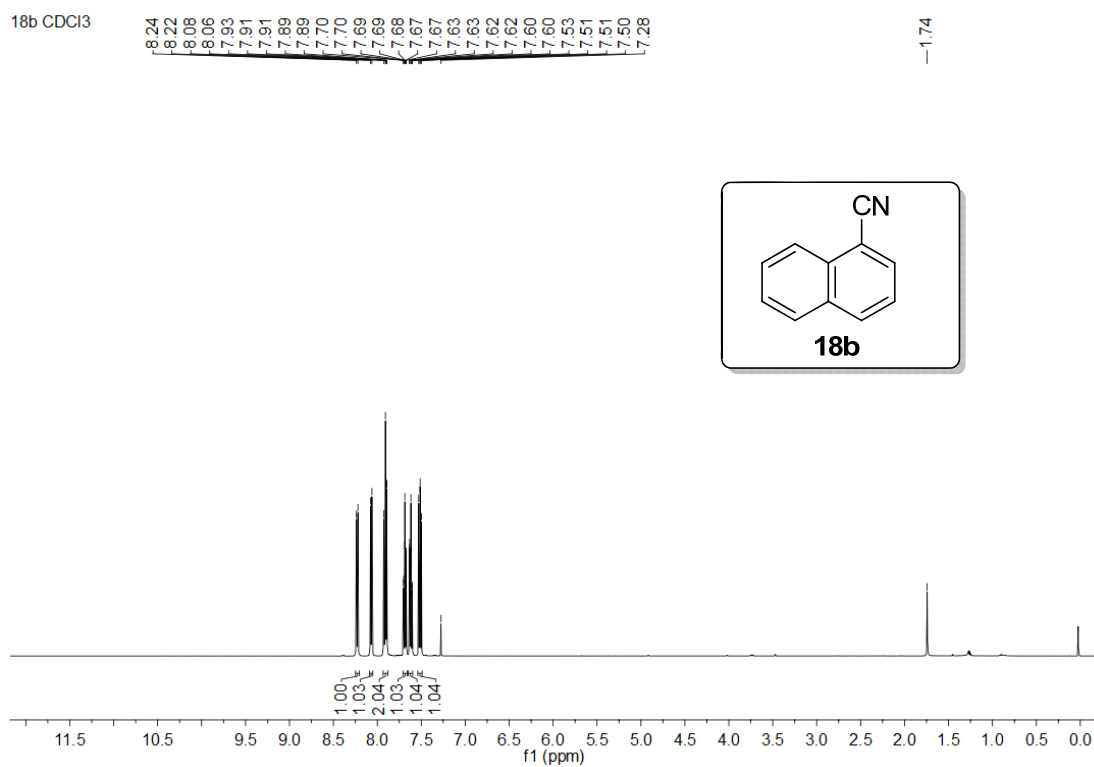

19b CDCl<sub>3</sub>

7.39  
7.39  
7.28  
7.10  
7.09

-1.74

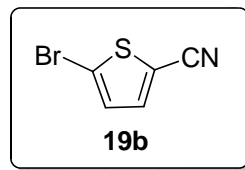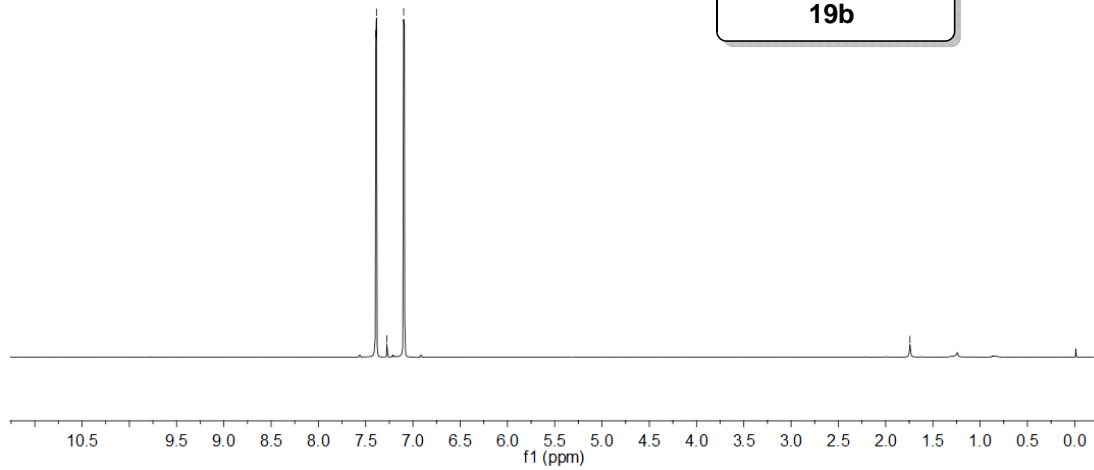

20b CDCl<sub>3</sub>

7.28  
7.07  
7.07  
6.49  
6.49

-1.61

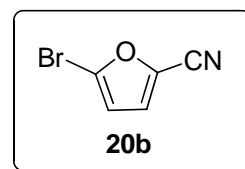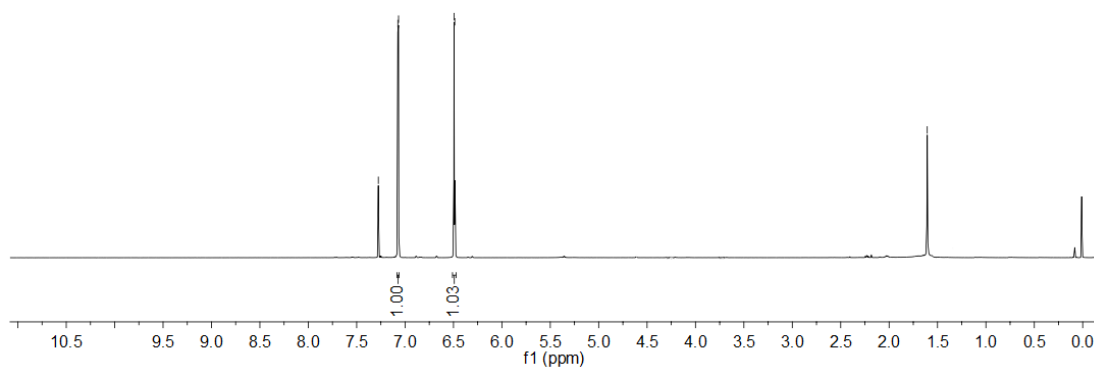

21b CDCl<sub>3</sub>

8.21  
8.19  
8.13  
7.75  
7.73  
7.47  
7.46  
7.44  
7.40  
7.38  
7.28

1.71  
1.61

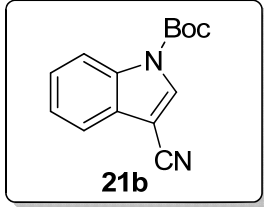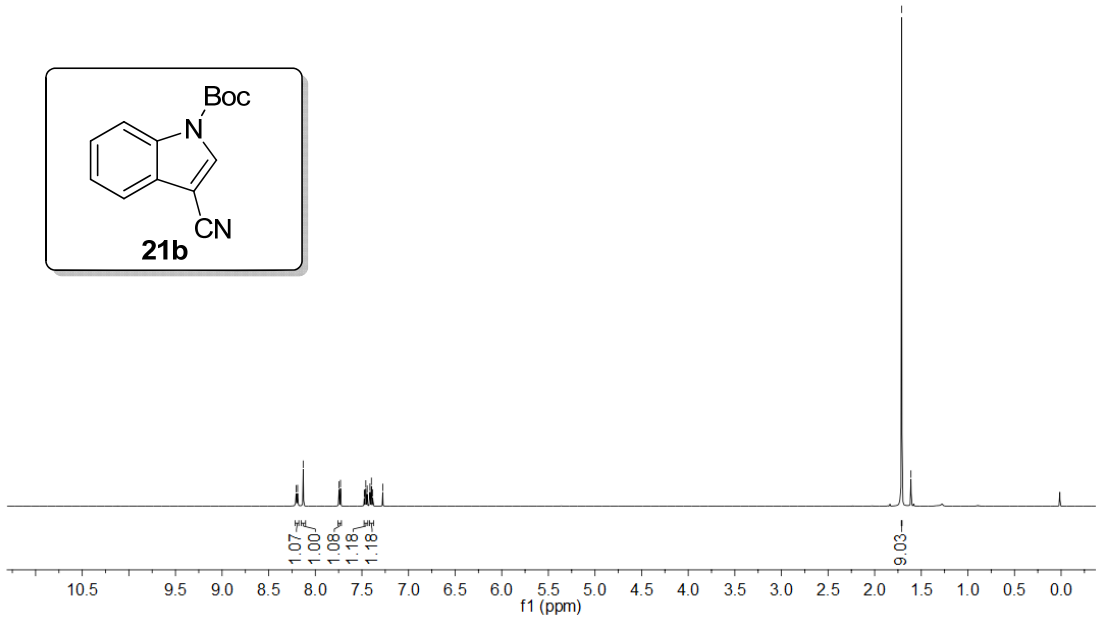

22b CDCl<sub>3</sub>

7.71  
7.69  
7.59  
7.58  
7.57  
7.55  
7.54  
7.53  
7.53  
7.51  
7.48  
7.40  
7.40  
7.38  
7.37  
7.28

1.60

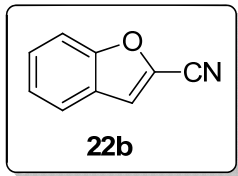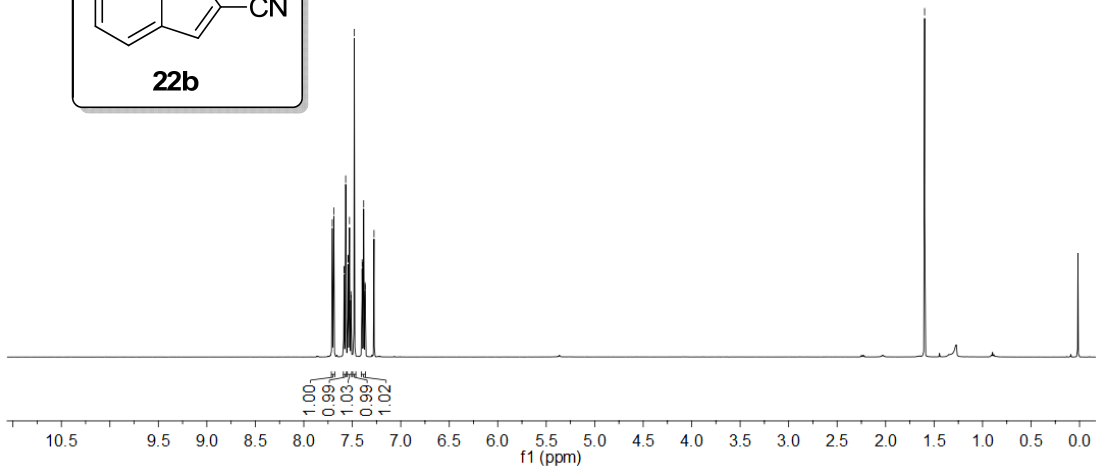

23b CDCl<sub>3</sub>

-7.28

2.04  
2.03  
1.76  
1.73  
1.70

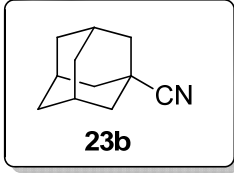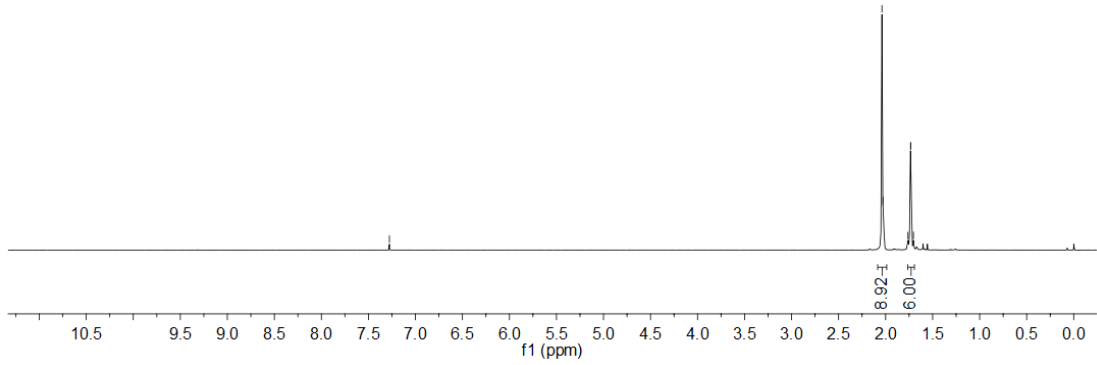

24b CDCl<sub>3</sub>

7.39  
7.38  
7.37  
7.36  
7.32  
7.32  
7.31  
7.31  
7.30  
7.29  
7.27  
7.25

-1.71

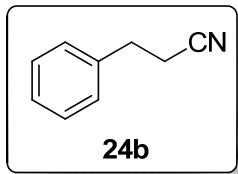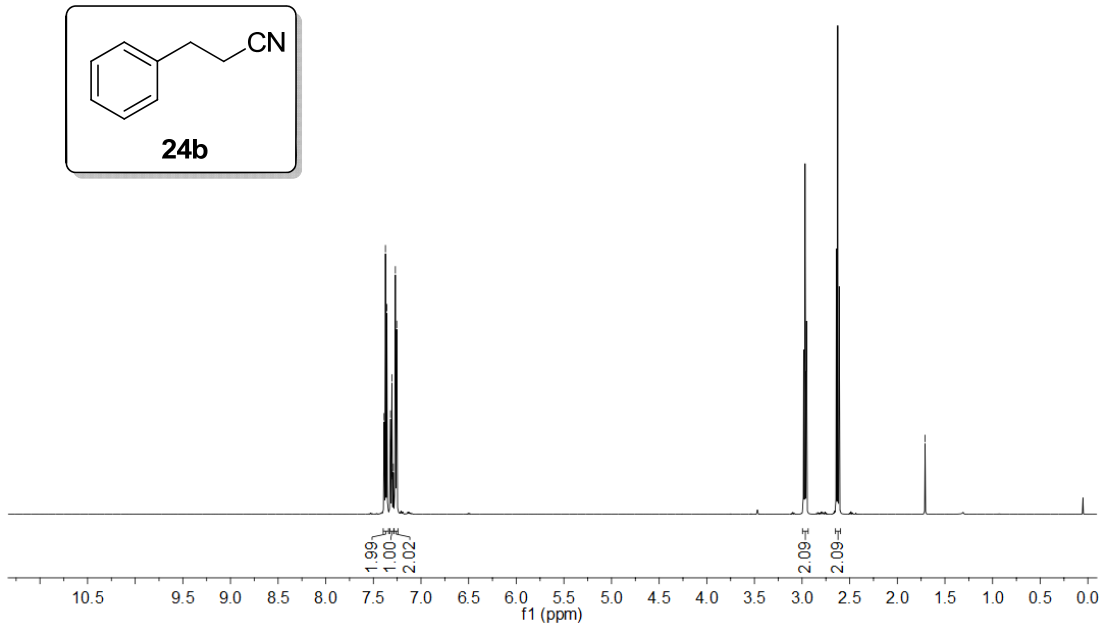

25b CDCl<sub>3</sub>

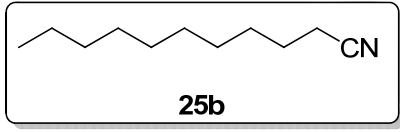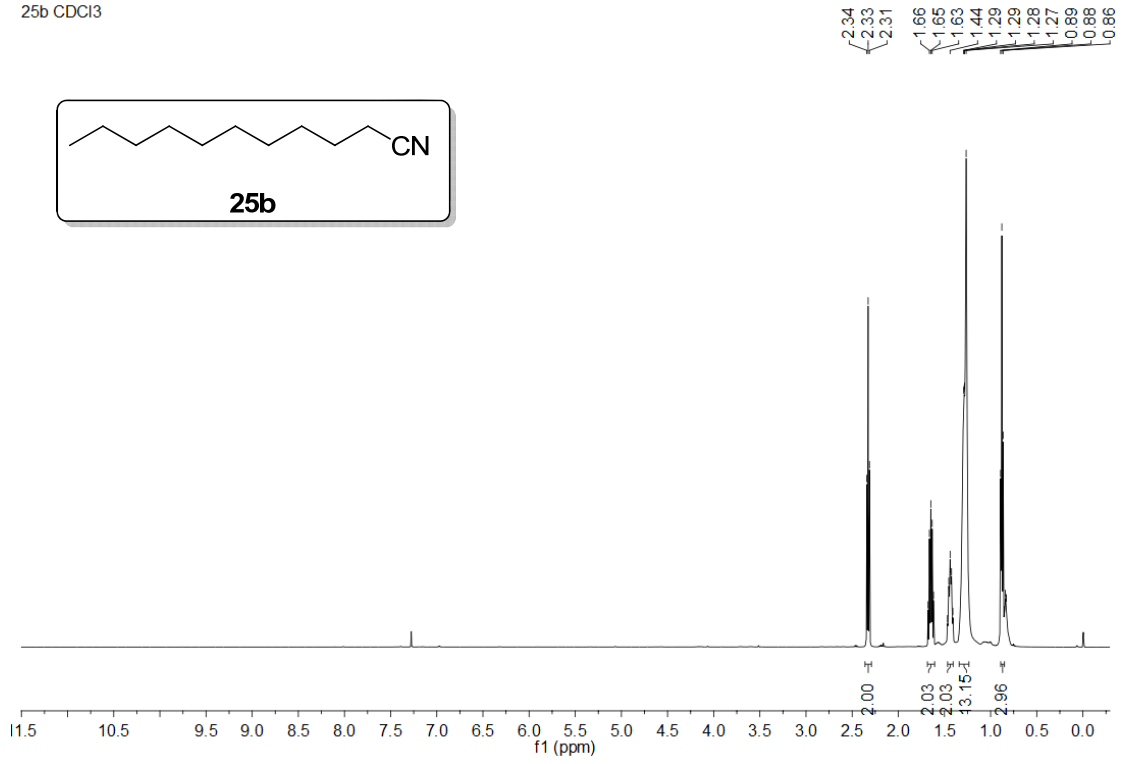

26b CDCl<sub>3</sub>

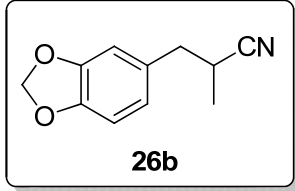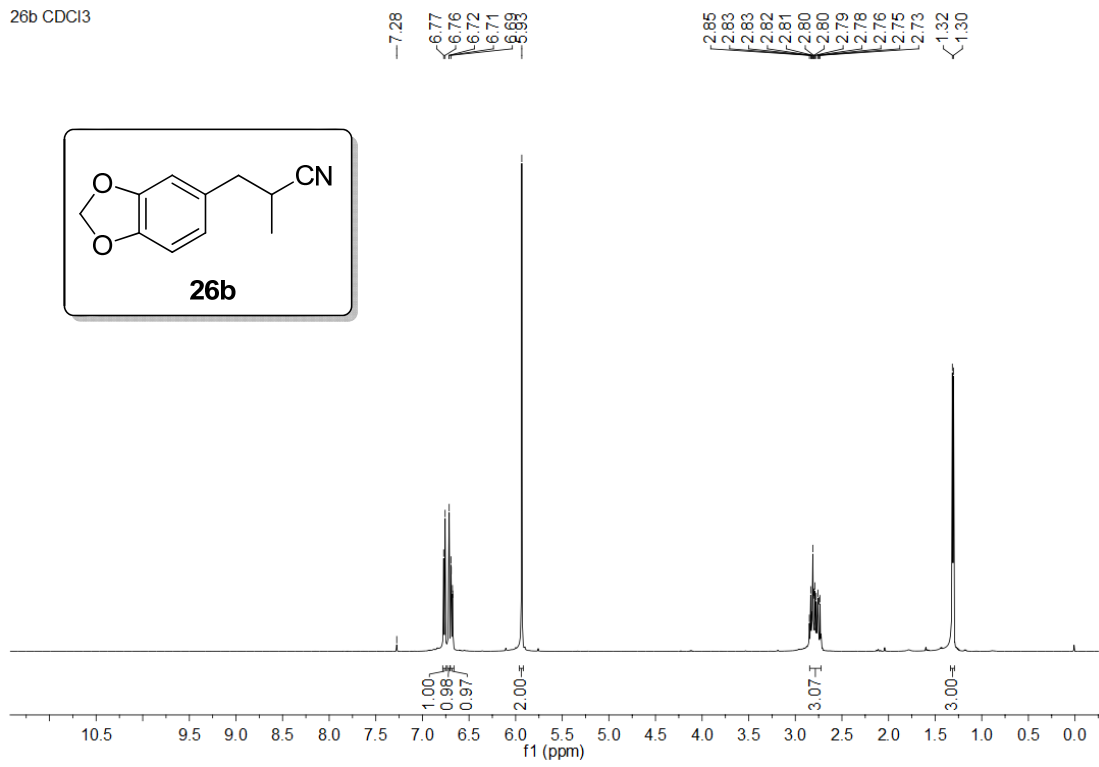

27b CDCl<sub>3</sub>

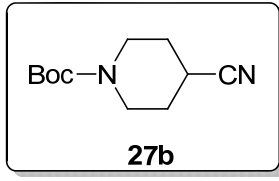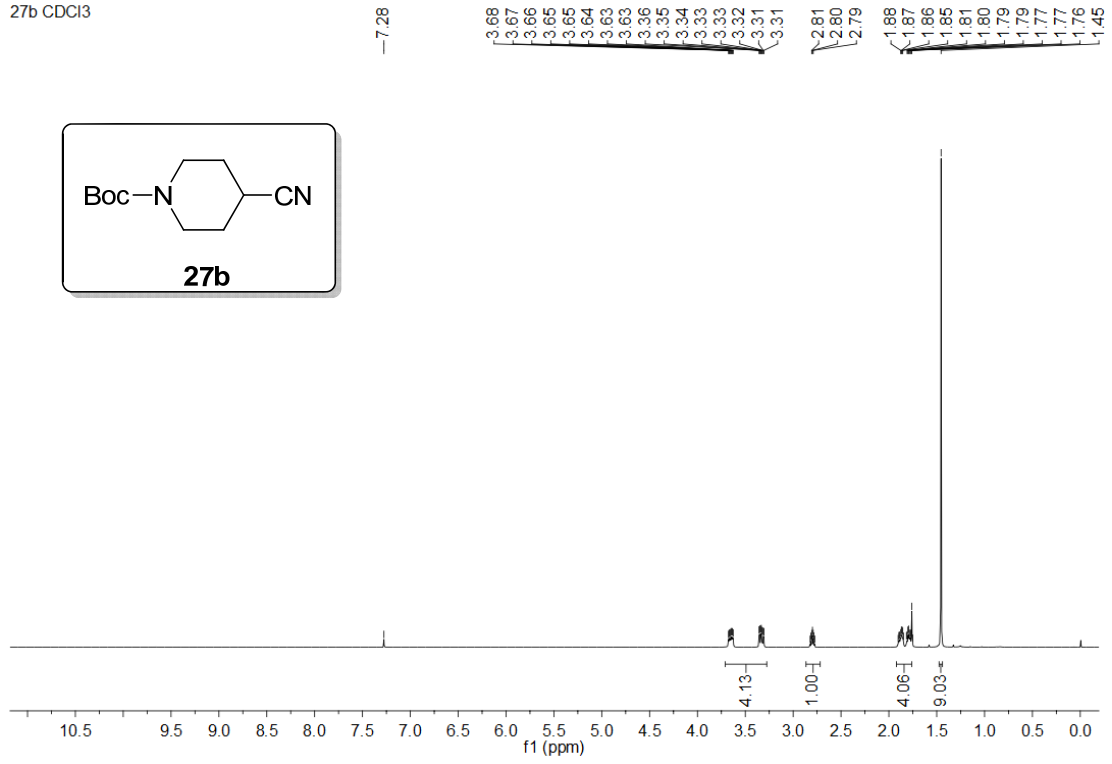

28b CDCl<sub>3</sub>

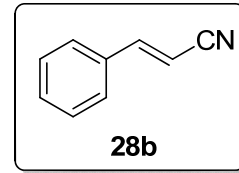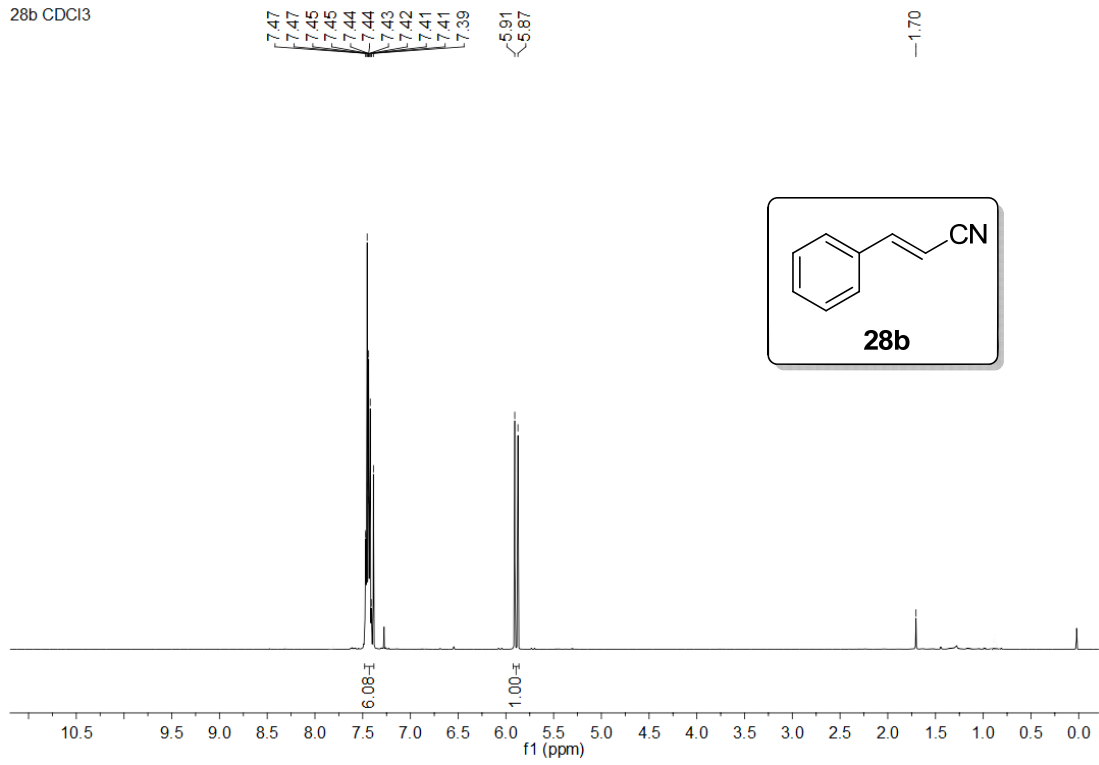



29b CDCl<sub>3</sub>

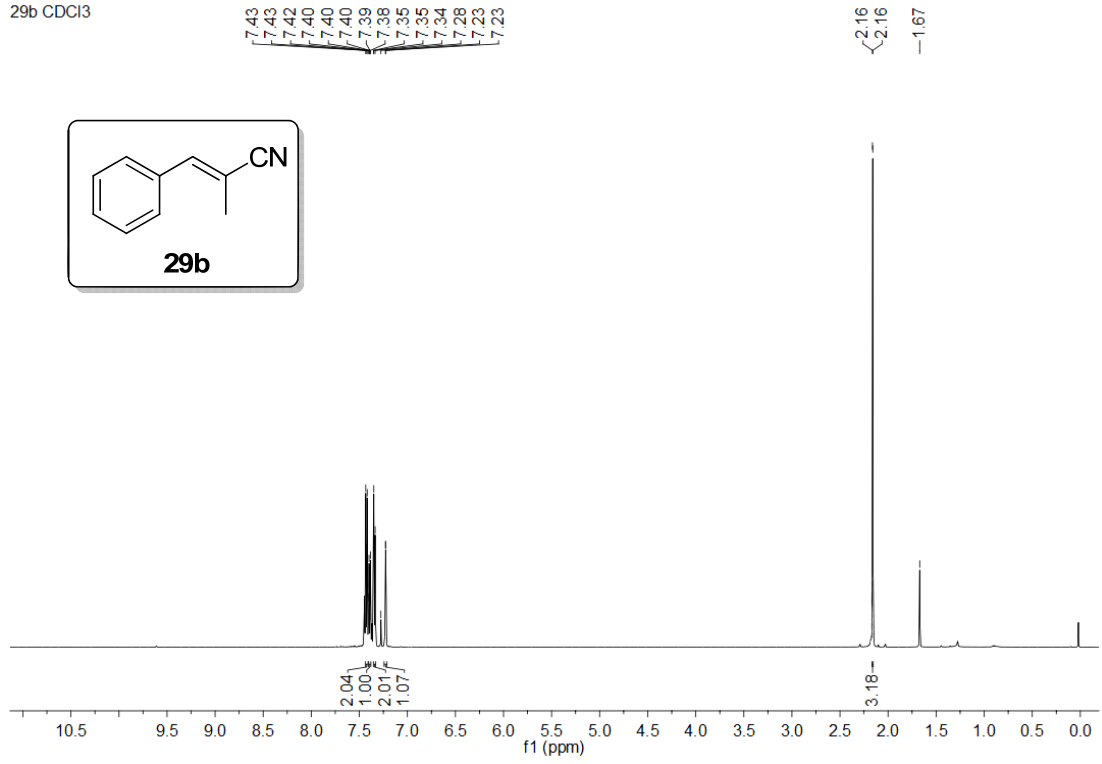

30b DMSO

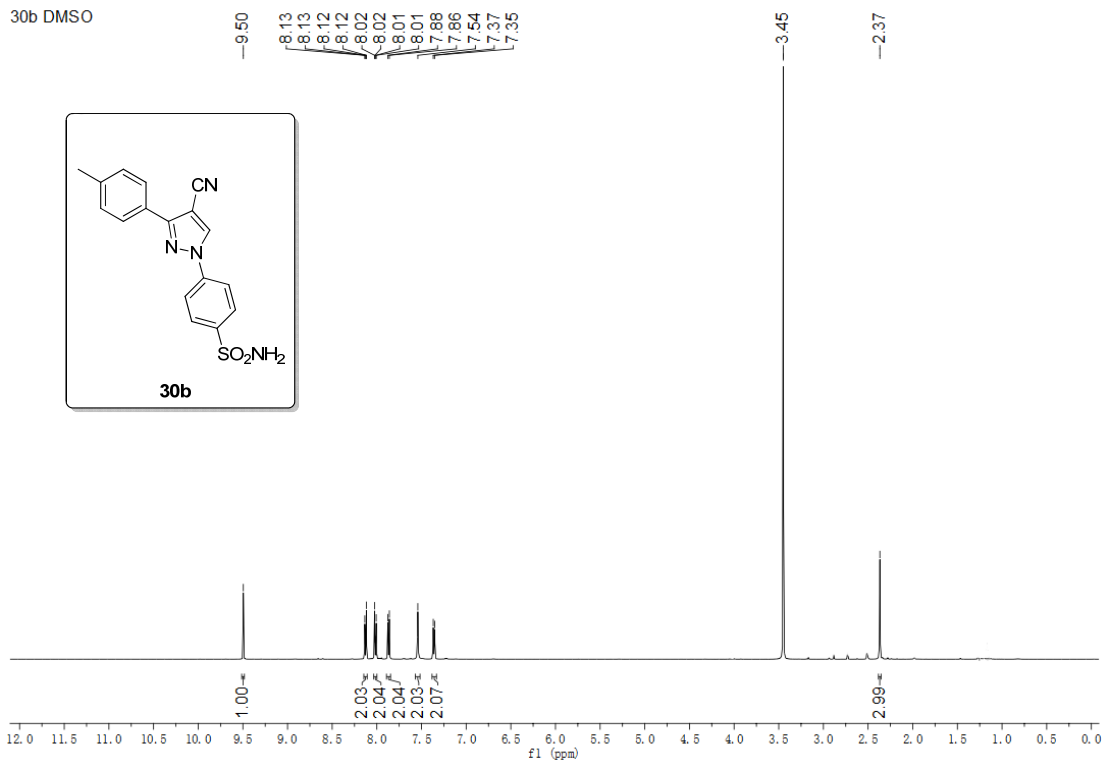

Supplement: c6ra26435b1.pdf [file c6ra26435b1.pdf]
